# Supplementary material for: Loss of TOP3B leads to increased R-loop formation and genome instability
Source: PubMed Central journal article supplement (PMC6936252; doi:10.1098/rsob.190222), 2019-12-04
Supplement: rsob190222supp1.pdf [file rsob190222supp1.pdf]

Figure S1

(a)

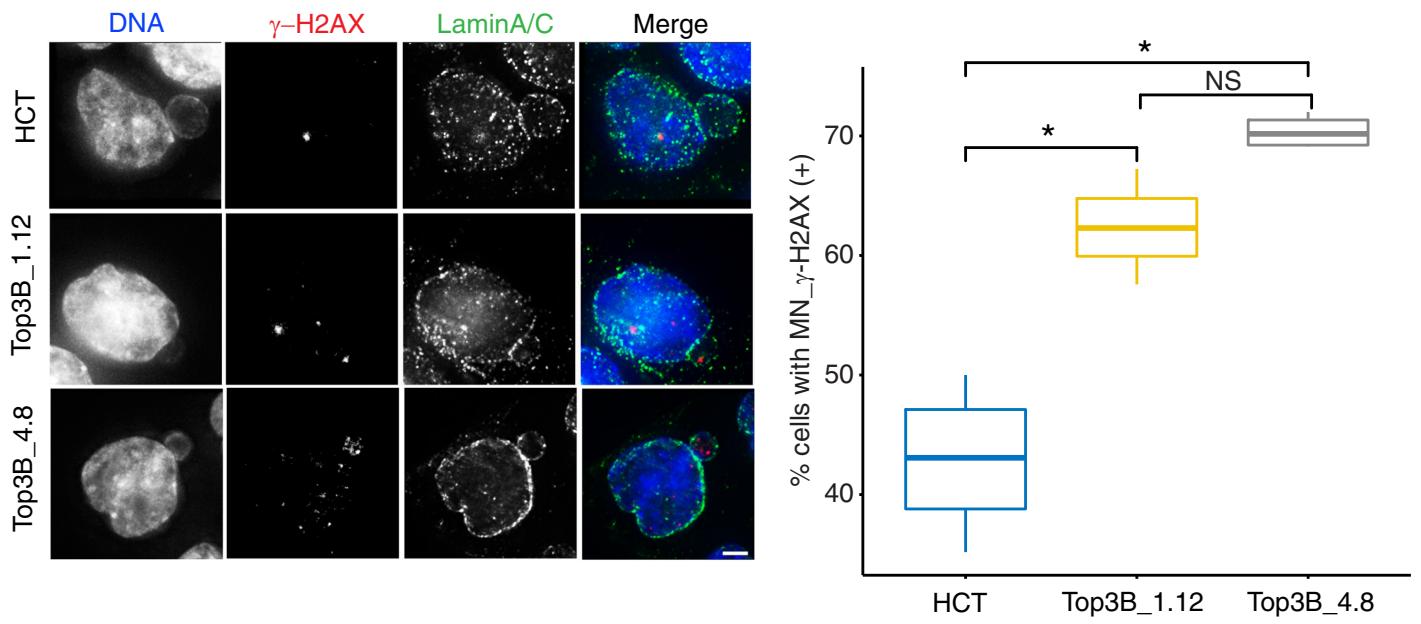

(b)

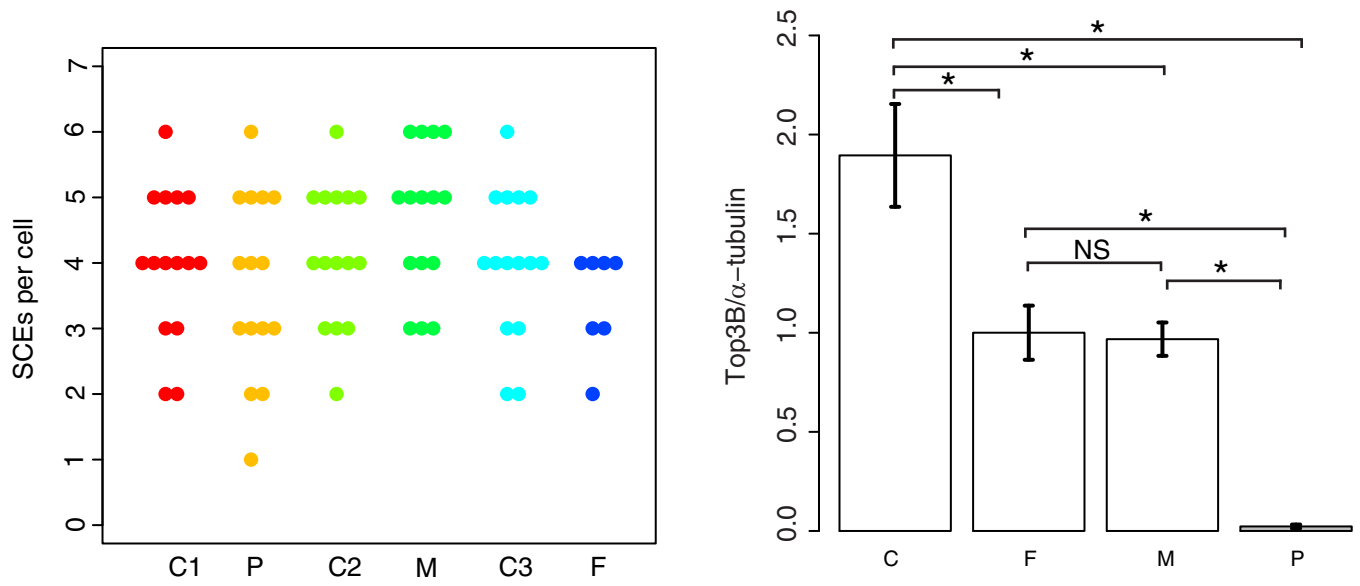

(c)

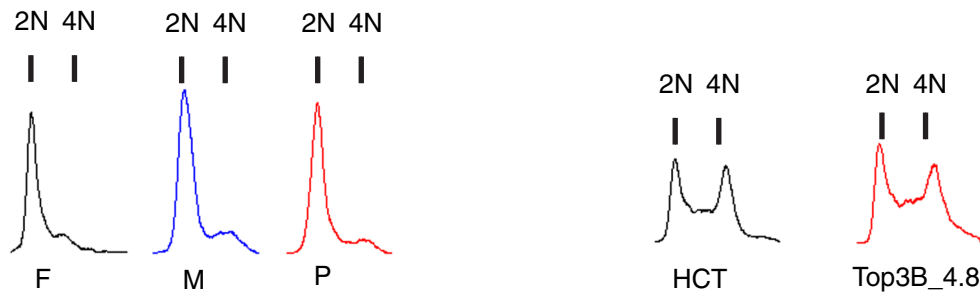

**Figure S1.** (a) Representative images of HCT116 control (HCT) and HCT116 TOP3B null clones stained for lamin A/C (green),  $\gamma$ -H2AX (red) and DNA (DAPI, blue). Right, cells with micronuclei displaying  $\gamma$ -H2AX (MN\_ $\gamma$ -H2AX) were scored from three independent experiments with at least 150 cells from each experiment. \* denotes  $P < 0.05$ . NS: no significant difference. Scale bar equals 5  $\mu$ m. (b) Left, sister chromatid exchanges were counted from 15 cells individually from age-matched-controls (C1, C2 and C3), parental controls (F, M) and patient (P) samples. Right, intensity measurement of TOP3B, with  $\alpha$ -tubulin as the loading control from three different immunoblots of control (C), parental heterozygote controls (F=father, M=mother) and homozygous TOP3B<sup>-/-</sup> patient (P) lymphoblasts as shown in Fig. 1B. (c) FACS analysis shows no difference in ploidy between TOP3B null lymphoblast and HCT116 TOP3B null cells versus controls (F, M: TOP3B<sup>+/-</sup>, P: TOP3B<sup>-/-</sup> and wild-type HCT116 TOP3B<sup>+/+</sup> (HCT), HCT116 TOP3B<sup>-/-</sup> (Top3B\_4.8)).#
