# Supplementary material for: Loss of TOP3B leads to increased R-loop formation and genome instability
Source: PubMed Central journal article supplement (PMC6936252; doi:10.1098/rsob.190222), 2019-12-04
Supplement: rsob190222supp2.pdf [file rsob190222supp2.pdf]

Figure S2

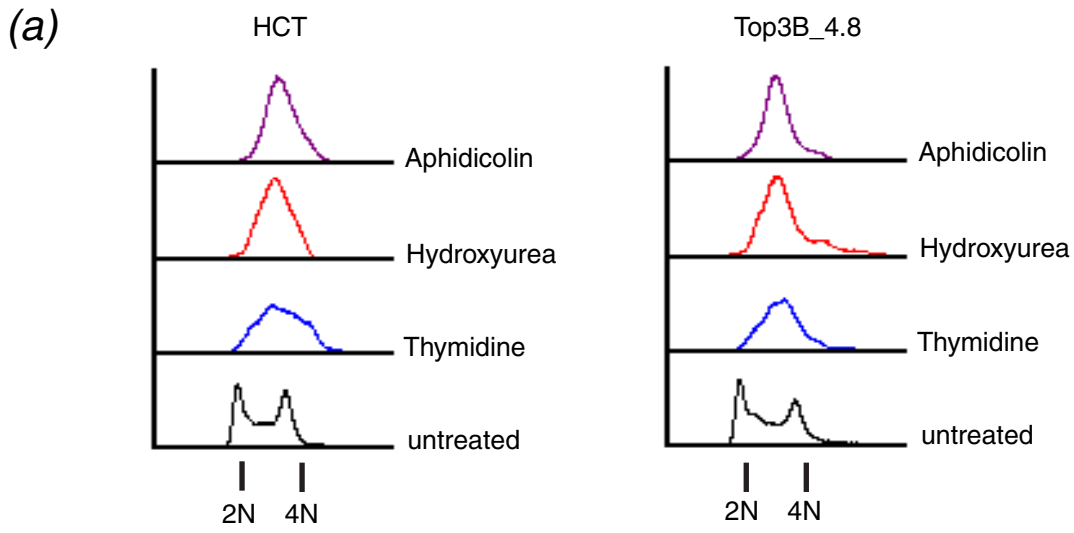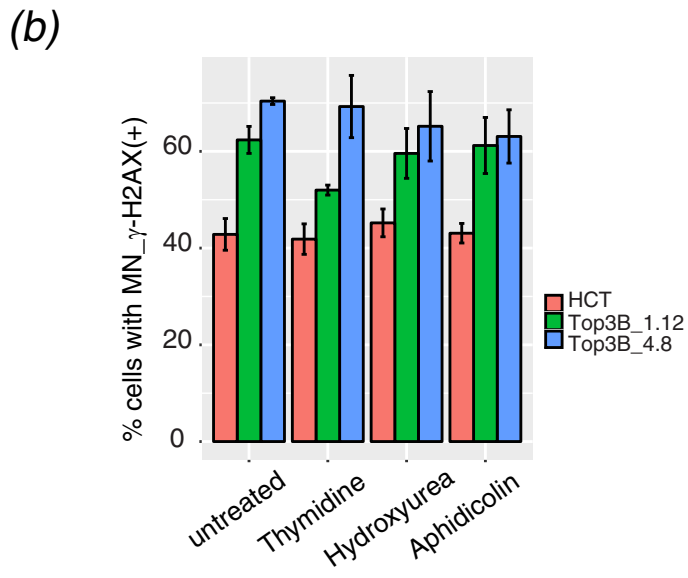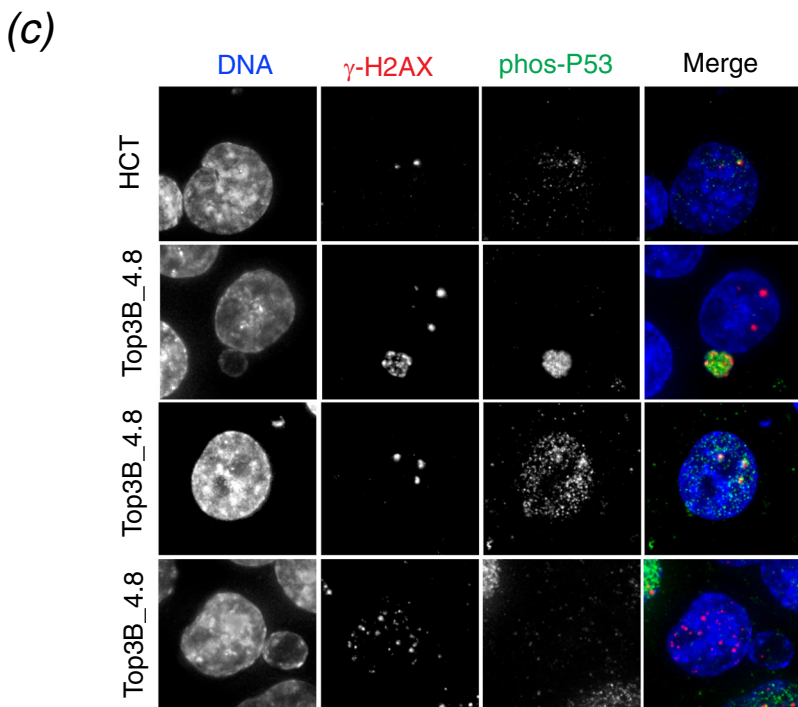

**Figure S2.** (a) FACS analyses of HCT116 control (HCT) and TOP3B null clone (Top3B\_4.8) treated with aphidicolin, hydroxyurea, thymidine, or no drug (untreated). (b) Quantification of cells with micronuclei displaying  $\gamma$ -H2AX (MN\_ $\gamma$ -H2AX) in HCT116 control (HCT) and TOP3B null cells (Top3B\_1.12 and Top3B\_4.8) after recovery from thymidine, hydroxyurea or aphidicolin treatment. Data are from three independent experiments, with at least 150 cells scored from each experiment. (c) Representative images of HCT116 control (HCT) and TOP3B null clones (Top3B\_4.8) stained for  $\gamma$ -H2AX (red) and phospho-P53 (green).
